# Supplementary material for: The Architecture and Complete Sequence of Mitochondrial Genome of an Assassin Bug Agriosphodrus Dohrni (Hemiptera: Reduviidae)
Source: PubMed Central journal article supplement — Int J Biol Sci. 2011 Jul 1;7(6):792–804. doi: 10.7150/ijbs.7.792 (PMC3133887; doi:10.7150/ijbs.7.792), 2011-07-01
Supplement: ijbsv07p0792s1.pdf [file ijbsv07p0792s1.pdf]

**SUPPLEMENTARY MATERIALS****Table S1: Primer sequences used in this study**

| No. fragment <sup>a</sup> | Primer ID | Nucleotide sequence (5'-3') | Reference                  |
|---------------------------|-----------|-----------------------------|----------------------------|
| 1                         | TM-J210   | AATTAAGCTATTAGGTTACATACC    | Simon <i>et al.</i> , 2006 |
|                           | TW-N1284  | TTAACTTTGAAGGTTAATAGTTT     | Simon <i>et al.</i> , 2006 |
| 2                         | F-1284    | CAACAGTCAAATGAAGTGC         | Present study              |
|                           | R-1718    | AGAAGGAGGTAATAGCCAG         | Present study              |
| 3                         | C1-J1718  | GGAGGATTTGGAAATTGATTAGTCC   | Simon <i>et al.</i> , 2006 |
|                           | C1-N2191  | CCCGGTAAAATTTAAAATATAAACTC  | Simon <i>et al.</i> , 2006 |
| 4                         | F-2191    | TGGGCACCTGAAGTTT            | Present study              |
|                           | R-2183    | CAGTTGGAACAGCAATGATT        | Present study              |
| 5                         | C1-J2183  | CAACATTTATTTTGATTTTTTGG     | Simon <i>et al.</i> , 2006 |
|                           | TL2-N3014 | TCCAATGCACTA ATCIGCCATATTA  | Simon <i>et al.</i> , 2006 |
| 6                         | C1-J2756  | ACATTTTTTCTCAACATT          | Simon <i>et al.</i> , 2006 |
|                           | C2-N3665  | CCACAAATTTCTGAACACTG        | Simon <i>et al.</i> , 2006 |
| 7                         | F-3665    | CCATTCCTGAACCATCCC          | Present study              |
|                           | R-5747    | TTGAGAAGGGTATGCGAG          | Present study              |
| 8                         | N3-J5747  | CCATTGAAATGTGGRITTTGATCC    | Simon <i>et al.</i> , 2006 |
|                           | TN-N6384  | AAAATTTAAAAGCATAATATTGAAG   | Simon <i>et al.</i> , 2006 |
| 9                         | F-6384    | TTCCGTTTCTCCCTTGT           | Present study              |
|                           | R-7077    | CTTCTCTTTATGTGGATTGC        | Present study              |
| 10                        | N5-J7077  | TTAAATCCTTTGAGTAAAATCC      | Simon <i>et al.</i> , 2006 |
|                           | N5-N7793  | TTAGGTTGAGATGGTTTAGG        | Simon <i>et al.</i> , 2006 |
| 11                        | N5-J7572  | AAAGGGAATTTGAGCTCTTTTWT     | Simon <i>et al.</i> , 2006 |
|                           | N4-N8727  | AAATCTTTRAITTGCTTATTCWTC    | Simon <i>et al.</i> , 2006 |
| 12                        | N4-J8641  | CCAGAAGAACACAAACCATG        | Simon <i>et al.</i> , 2006 |
|                           | N4L-N9629 | GTTTGTGAGGGTGAATAGG         | Simon <i>et al.</i> , 2006 |
| 13                        | F-9629    | CAATAAAGGTATGGATGCC         | Present study              |
|                           | R-10933   | TTTGCCCTCAAGGTAGT           | Present study              |
| 14                        | CB-J10933 | GGACGWGGWATTTATTATGGATC     | Simon <i>et al.</i> , 2006 |
|                           | CB-N11526 | ATTACTCCTCTAGCTTATTAGGAATTG | Simon <i>et al.</i> , 2006 |
| 15                        | CB-J11335 | CATATTCAACCAGAATGATA        | Simon <i>et al.</i> , 2006 |
|                           | N1-N12067 | AATCGTTCCTCATTGATTTTGC      | Simon <i>et al.</i> , 2006 |
| 16                        | F-12067   | GAAACTAATCTCTGACTCCC        | Present study              |
|                           | R-12261   | CTTGTAGGAGGATTACG           | Present study              |
| 17                        | N1-J12261 | TACCTCATAAGAAATAGTTIGAGC    | Simon <i>et al.</i> , 2006 |
|                           | LR-N13000 | TTACCTTAGGGATAACAGCGTAA     | Simon <i>et al.</i> , 2006 |
| 18                        | LR-J12888 | CCGGTCTGAACCTCAGATCATGTA    | Simon <i>et al.</i> , 2006 |
|                           | LR-N13889 | ATTTATTGTACCTTTTGTATCAG     | Simon <i>et al.</i> , 2006 |
| 19                        | LR-J13342 | CCTTAGCACAGTTAAAATACTGC     | Simon <i>et al.</i> , 2006 |
|                           | LR-N14220 | TTATGCACATATCGCCCGTC        | Simon <i>et al.</i> , 2006 |
| 20                        | F-14197   | TCTCTTCACTTCGGG             | Present study              |
|                           | R-14220   | TGTCAGGTCAAGGTGTAGT         | Present study              |
| 21                        | LR-J14197 | GTAAAYCTACTTTGTACGACTT      | Present study              |
|                           | SR-N14745 | GTGCCAGCAAYCGCGTTATAC       | Present study              |
| 22                        | F-14745   | ATTCATTCACCCIGGCT           | Present study              |
|                           | R-210     | CCTAATCATCTTTCTGCTCT        | Present study              |

<sup>a</sup>The orientation is as shown in **Fig. 1**.

**Table S2 General informatics of the taxa used in this study**

| Order/suborder  | Infraorder/ superfamily | Family           | Species                           | Accession Number |
|-----------------|-------------------------|------------------|-----------------------------------|------------------|
| Thysanoptera    |                         | Thripidae        | <i>Thrips imaginis</i>            | NC_004371        |
| Auchenorrhyncha | Fulgoroidea             | Fulgoridae       | <i>Lycorma delicatula</i>         | NC_012835        |
|                 |                         | Issidae          | <i>Sivaloka damnosa</i>           | NC_014286        |
| Heteroptera     | Gerromorpha             |                  |                                   |                  |
|                 | Hydrometroidea          | Hydrometridae    | <i>Hydrometra</i> sp.             | NC_012842        |
|                 | Gerroidea               | Gerridae         | <i>Gerris</i> sp.                 | NC_012841        |
|                 | Nepomorpha              |                  |                                   |                  |
|                 | Corixoidea              | Corixidae        | <i>Sigara septemlineata</i>       | FJ456941         |
|                 | Ochtheroidea            | Gelastocoridae   | <i>Nerthra</i> sp.                | NC_012838        |
|                 |                         | Ochteridae       | <i>Ochterus marginatus</i>        | NC_012820*       |
|                 | Notonectoidea           | Notonectidae     | <i>Enithares tibialis</i>         | NC_012819        |
|                 |                         | Pleidae          | <i>Paraplea frontalis</i>         | NC_012822        |
|                 | Nepoidea                | Nepidae          | <i>Laccotrephes robustus</i>      | NC_012817        |
|                 |                         | Belostomatidae   | <i>Diplonychus rusticus</i>       | FJ456939*        |
|                 | Naucoroidea             | Naucoridae       | <i>Ilyocoris cimicoides</i>       | NC_012845        |
|                 |                         | Aphelocheiridae  | <i>Aphelocheirus ellipsoideus</i> | FJ456940*        |
|                 | Leptopodomorpha         |                  |                                   |                  |
|                 | Saldoidea               | Saldidae         | <i>Saldula arsenjevi</i>          | NC_012463        |
|                 | Leptopodoidea           | Leptopodidae     | <i>Leptopus</i> sp.               | FJ456946         |
|                 | Cimicomorpha            |                  |                                   |                  |
|                 | Cimicoidea              | Anthocoridae     | <i>Orius niger</i>                | NC_012429*       |
|                 | Reduivioidea            | Reduviidae       | <i>Agriosiphodrus dohrni</i>      | HM071001         |
|                 |                         |                  | <i>Triatoma dimidiata</i>         | NC_002609        |
|                 |                         |                  | <i>Valentia hoffmanni</i>         | NC_012823        |
|                 | Miroidea                | Miridae          | <i>Lygus lineolaris</i>           | EU401991*        |
|                 | Pentatomomorpha         |                  |                                   |                  |
|                 | Aeadoidea               | Aradidae         | <i>Neuroctenus parus</i>          | NC_012459        |
|                 | Pentatomoidea           | Pentatomidae     | <i>Nezara viridula</i>            | NC_011755        |
|                 |                         |                  | <i>Halyomorpha halys</i>          | NC_013272        |
|                 |                         | Cydnidae         | <i>Macroscytus subaeneus</i>      | NC_012457*       |
|                 |                         | Plataspidae      | <i>Coptosoma bifaria</i>          | NC_012449        |
|                 | Lygaeoidea              | Berytidae        | <i>Yemmalysus parallelus</i>      | NC_012464        |
|                 |                         | Colobathristidae | <i>Phaenacantha marcida</i>       | NC_012460*       |
|                 |                         | Malcidae         | <i>Malcus inconspicuus</i>        | NC_012458        |
|                 |                         | Geocoridae       | <i>Geocoris pallidipennis</i>     | NC_012424*       |
|                 | Pyrrhocoroidea          | Largidae         | <i>Physopelta gutta</i>           | NC_012432        |
|                 |                         | Pyrrhocoridae    | <i>Dysdercus cingulatus</i>       | NC_012421        |
|                 | Coreoidea               | Alydidae         | <i>Riptortus pedestris</i>        | NC_012462        |
|                 |                         | Coreidae         | <i>Hydaropsis longirostris</i>    | NC_012456        |
|                 |                         | Rhopalidae       | <i>Aeschyntelus notatus</i>       | NC_012446*       |
|                 |                         |                  | <i>Stictopleurus subviridis</i>   | NC_012888        |

“\*”: Incomplete mitogenomes.

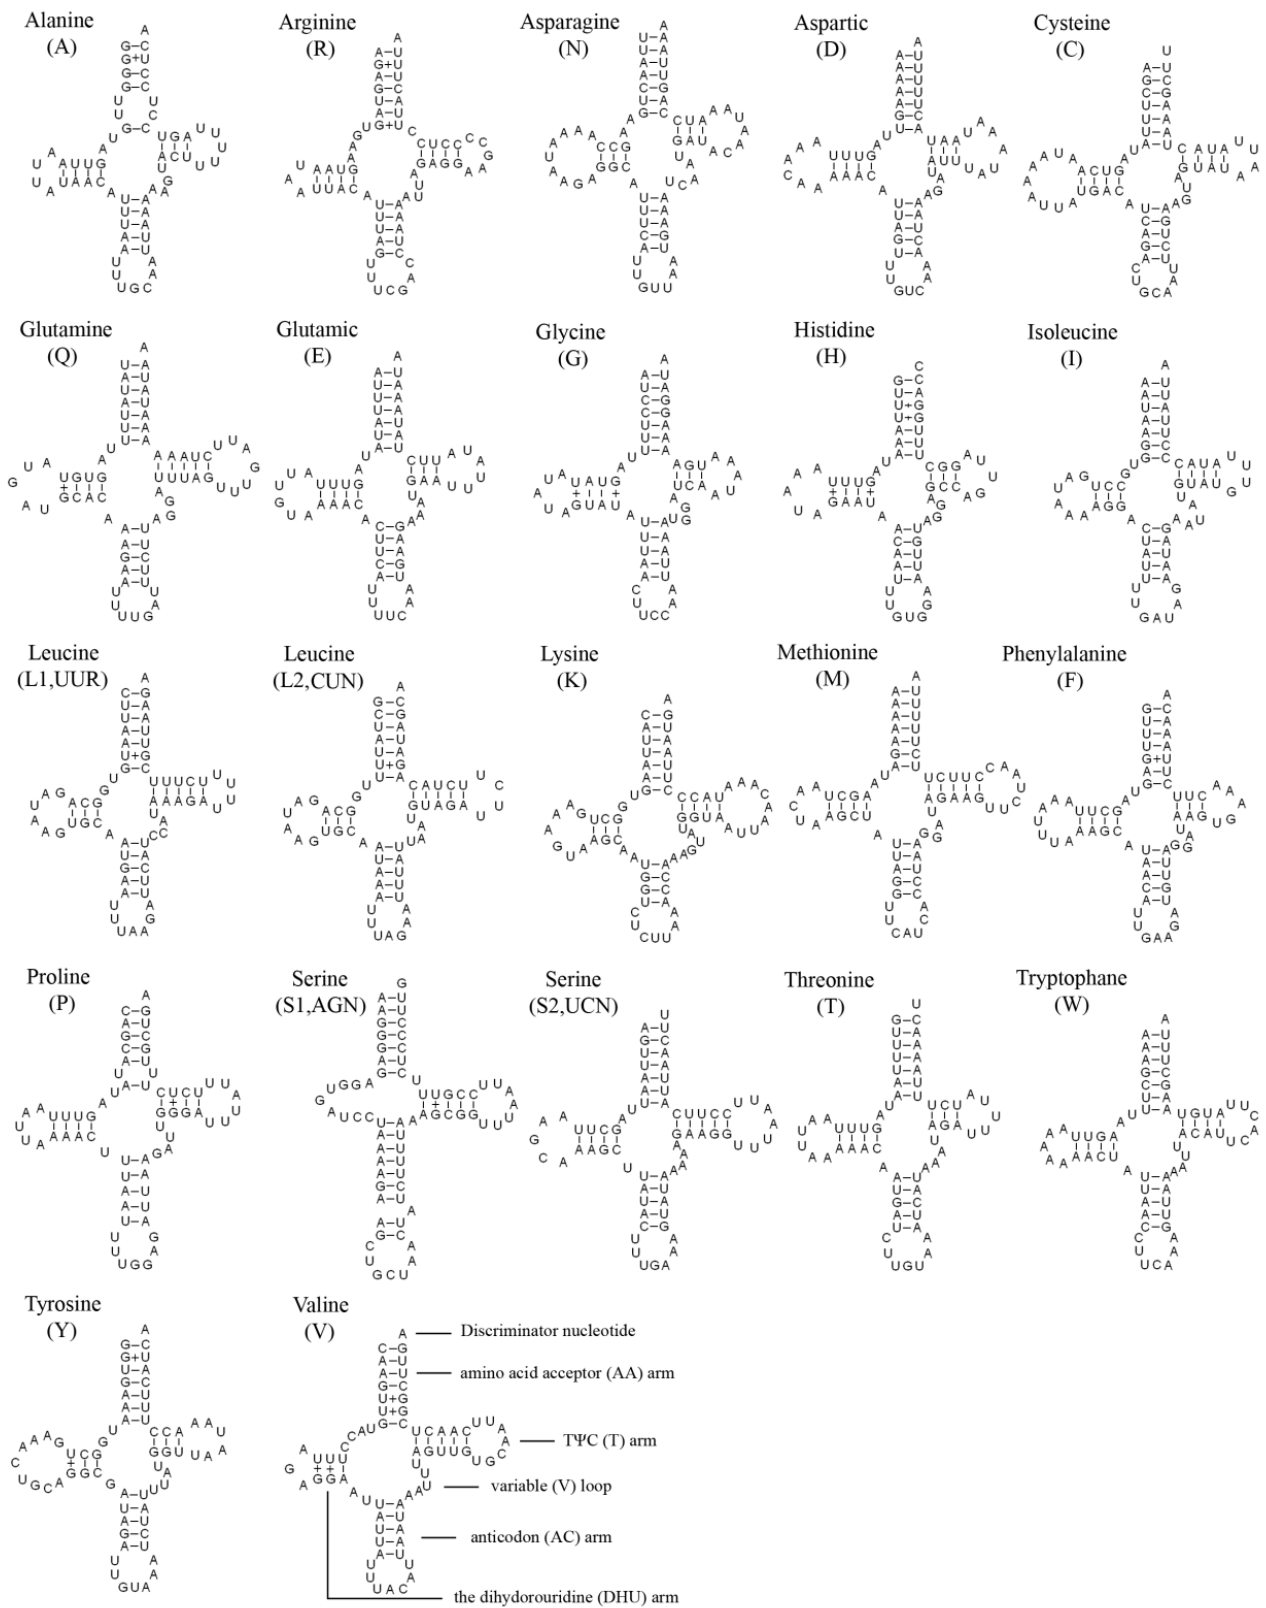

**Figure S1. Inferred secondary structure of 22 tRNAs of the *A. dohrni* mitogenome.** The tRNAs are labeled with the abbreviations of their corresponding amino acids. Dashed (-) indicate Watson-Crick base pairing and (+) indicate G-U base pairing.
